# Supplementary material for: Food Security and the COVID-19 Crisis from a Consumer Buying Behaviour Perspective—The Case of Bangladesh
Source: MDPI journal article supplement (doi:10.3390/foods10123073), 2021-12-10
Supplement: s1 [file s1]

## Questionnaire

Food Security and COVID-19 Crisis from the Consumer Buying Behavior  
Context – the case of Bangladesh

### Section- A (Demography & General Information About COVID-19)

**A. Gender**

1. Male 2. Female

**B. Age**

1. < 20 years 2. 20-30 years 3. 30-40 years 4. > 40 years

**C. Occupation**

1. Government job holder 2. Private Jobholder 3. Day labor 4. Students 5. Housewife  
6. Unemployment 7. Agriculture 8. Business 9. Others/PhD fellow

**D. Regular Income (in BDT)**

1. 0- 10000 2. 10,000-20,000 3. 20,000-30,000 4. 30000-40000 5. Above 40000

**E. The number of people in the household?**

1. < 2 persons 2. 3 persons 3. 4 persons 4. > 5 persons

**F. Did your current income decrease during the coronavirus (COVID-19) epidemic?**

1. Yes 2. No

**G. How many times are you eating in a day during COVID 1-9?**

1. 2 times 2. 3 times 4. 4 times 5. More than 4 times

**H. Are you getting any aid from any sources?**

1. Yes 2 No

### Section-B: (Measurements construct)

**Direction:** For each question given below, please tick (✓) only one option that best reflects your opinion on the following five point scale:

| 1                 | 2        | 3       | 4     | 5              |
|-------------------|----------|---------|-------|----------------|
| Strongly Disagree | Disagree | Neutral | Agree | Strongly Agree |

| Coding No                | Variables (Independent)                         | Strongly Disagree | Disagree | Neutral | Agree | Strongly Agree |
|--------------------------|-------------------------------------------------|-------------------|----------|---------|-------|----------------|
| <b>Consumer Behavior</b> |                                                 |                   |          |         |       |                |
| CB1                      | I think COVID19 affects my purchasing behavior. | 1                 | 2        | 3       | 4     | 5              |

|                                            |                                                                                   |   |   |   |   |   |
|--------------------------------------------|-----------------------------------------------------------------------------------|---|---|---|---|---|
| CB2                                        | I think COVID -19 crisis is driving me to food hoarding.                          | 1 | 2 | 3 | 4 | 5 |
| CB3                                        | I think, COVID-19 influences to reduce the food waste.                            | 1 | 2 | 3 | 4 | 5 |
| <b>Food Anxiety</b>                        |                                                                                   |   |   |   |   |   |
| FAN1                                       | I'm concerned when my food runs out.                                              | 1 | 2 | 3 | 4 | 5 |
| FAN2                                       | I am so anxious because I have a little money to buy food.                        | 1 | 2 | 3 | 4 | 5 |
| <b>Food Price</b>                          |                                                                                   |   |   |   |   |   |
| FP1                                        | Food prices are more expensive during COVID-19 than before.                       | 1 | 2 | 3 | 4 | 5 |
| FP2                                        | I cannot afford the food to buy properly because of the price hike.               | 1 | 2 | 3 | 4 | 5 |
| <b>Food Availability</b>                   |                                                                                   |   |   |   |   |   |
| FA1                                        | I think, Food is not available in grocery shops and local shops in my area.       | 1 | 2 | 3 | 4 | 5 |
| FA2                                        | I think adequate food is not available to meet the consumer daily demand.         | 1 | 2 | 3 | 4 | 5 |
| <b>Food Quality &amp; Safety</b>           |                                                                                   |   |   |   |   |   |
| FQS1                                       | I think food quality is inferior during COVID-19 than before.                     | 1 | 2 | 3 | 4 | 5 |
| FQS2                                       | I feel safe regarding food supply from producers during COVID 19?                 | 1 | 2 | 3 | 4 | 5 |
| FQS3                                       | I think the suppliers provide a low quality of food with adulterated              | 1 | 2 | 3 | 4 | 5 |
| <b>Food Insecurity</b>                     |                                                                                   |   |   |   |   |   |
| FI1                                        | During coronavirus (COVID-19), do you feel being secured regarding foods?         | 1 | 2 | 3 | 4 | 5 |
| FI2                                        | During coronavirus (COVID-19), are you able to meet your daily nutritional needs? | 1 | 2 | 3 | 4 | 5 |
| <b>Future Perception about Food Crisis</b> |                                                                                   |   |   |   |   |   |
| FPFC1                                      | I think, country will face a big food crisis after the pandemic.                  | 1 | 2 | 3 | 4 | 5 |
| FPFC2                                      | I think, The price of food will be higher after the pandemic.                     | 1 | 2 | 3 | 4 | 5 |
| FPFC3                                      | I think, after pandemic, Food production will be increased but                    | 1 | 2 | 3 | 4 | 5 |

|       |                                                                                                                      |   |   |   |   |   |
|-------|----------------------------------------------------------------------------------------------------------------------|---|---|---|---|---|
|       | food quality will decrease                                                                                           |   |   |   |   |   |
| FPFC4 | I think, Producers/ suppliers will provide adulterated foods which are harmful for health to make higher food demand | 1 | 2 | 3 | 4 | 5 |

**“Thanks for your nice Cooperation”**
